# Supplementary material for: A cavity ion source for high-ionization efficiency neodymium isotope-ratio analyses in the geosciences
Source: Royal Society of Chemistry journal article supplement (doi:10.1039/d0ja00228c), 2020-01-01
Supplement: d0ja00228c1.xlsx [file d0ja00228c1.xlsx]

## Sheet: Sheet1
Summary of Nd runs with the 15-inch cavity mass spectrometer
Cavity	Source Type	Cavity		Load	Aqua	Re	Re	142/144Nd*			Efficiency			142Nd Volts
No.		Depth	Diam.	Size	Dag	Foil	Powder	Mean	2SE**	ppm	Nd	NdO	Nd/NdO	Equivalent
CA1	Simplified Shield lens	12	1.54	10	Y	N	Y	1.14663	0.000684934	597.344	0.65012	0.00328	198.207	55.6
CA2	Simplified Shield lens	16	1.54	2.35	N	Y	Y	1.14193	5.50217e-05	48.1833	2.08	0.43	4.83721	41.1
CA2	Simplified Shield lens	16	1.54	2.35	N	Y	N				0.375	0.234	1.60256	7.4
CA2	Simplified Shield lens	16	1.54	2.35	N	Y	N				0.0032	0.00713	0.448808	0
CA2	Simplified Shield lens	16	1.54	2.35	N	Y	N	1.14222	6.42977e-05	56.2918	0.069	0.056	1.23214	1.4
CA2	Simplified Shield lens	16	1.54	2.35	N	Y	N	1.14265	0.00038343	335.562	0.20338	0.1561	1.30288	4
CA2	Simplified Shield lens	16	1.54	2.35	N	Y	N				0.04983	0.00136	36.6397	1
CA2	Simplified Shield lens	16	1.54	2.35	Y	Y	N				0.34793	0.00496	70.1472	6.8
CA2	Loveless and Russell	16	1.54	2.35	Y	Y	N				0.044569	0.00661	6.74266	0.9
CA2	Loveless and Russell	16	1.54	2.35	Y	Y	N				0.06897	0.01107	6.23035	1.4
CB1	Simplified Shield lens	10	1.54	2.35	N	Y	N	1.14196	6.37446e-05	55.8203	0.416188	0.624103	0.666858	8.2
CB1	Simplified Shield lens	10	1.54	2.35	N	y	N	1.14182	5.70089e-05	49.9282	0.93	0.74	1.25676	18.3
CB1	Simplified Shield lens	10	1.54	2.35	N	Y	N				0.17	0.35	0.485714	3.5
CB1	Simplified Shield lens	10	1.54	0.5	Y	N	Y				0.23978	0.16417	1.46056	1
CB1	Loveless and Russell	10	1.54	2.35	Y	Y	N				0.01562	0.06101	0.256024	0.3
CC1	Simplified Shield lens	17	1.54	2.35	N	Y	N				0.334	0.5264	0.634498	6.6
CC1	Simplified Shield lens	17	1.54	2.35	N	Y	N				0.11003	0.03279	3.3556	2.2
CC1	Loveless and Russell	7	1.54	2.35	Y	Y	N	1.14116	4.09999e-05	35.9282	0.13819	0.06537	2.11397	2.7
CC1	Loveless and Russell	17	1.54	2.35	Y	Y	N	1.13877	0.00014708	129.157	0.15912	0.07797	2.04078	3.1
CC2	Simplified Shield lens	11.5	1.54	0.5	Y	N	Y				0.23727	0.43407	0.546617	1
CC2	Simplified Shield lens	11.5	1.54	0.5	Y	N	Y				0.9927	0.48531	2.0455	4.2
CD1	Simplified Shield lens	40	1.54	0.5	Y	N	Y				0.23978	0.16417	1.46056	1
CD1	Loveless and Russell	40	1.54	2.35	Y	Y	N				0.1814	0.08418	2.15491	3.6
* average 142Nd/144Nd ratio calculated after filtering for outliers (at the 5 SE level)
** Two standard errors about the mean
